# Supplementary material for: Factors Associated with Postpartum Depression in Mothers of the Kangaroo Mother Care Program in Southern Colombia: A Cross-Sectional Study
Source: Research Square preprint supplement (doi:10.21203/rs.3.rs-7171044/v1), 2025-11-11
Supplement: Supplementary file 1 [file f8753095fa640fe52a9185a4.docx]

| **Factors** | **Depression** | | | | **Statistic** | **p Value** |
| --- | --- | --- | --- | --- | --- | --- |
| **No** | **%** | **Si** | **%** |
| Abortions |  |  |  |  |  |  |
| No | 86 | 78.2 | 24 | 21.8 | 0.48 | 0.48 |
| Yes | 21 | 70 | 9 | 30 |
| Nº prenatal cares |  |  |  |  |  |  |
| Less than six | 39 | 72.2 | 15 | 27.8 | 0.52 | 0.47 |
| Equal or more than six | 68 | 79.1 | 18 | 20.9 |
| <28 weeks | 2 | 100 | 0 |  | 0.81 | 0.85 |
| 28 to 32 weeks | 16 | 72.7 | 6 | 27.3 |
| >32 to < 37 weeks | 67 | 77 | 20 | 23 |
| Equal > 37 weeks | 22 | 75.9 | 7 | 24.1 |
| Type of delivery |  |  |  | . |  |  |
| Vaginal | 38 | 79.2 | 10 | 20.8 | 0.12 | 0.73 |
| Caesarean | 69 | 75 | 23 | 25 |
| History of illness |  |  |  |  |  |  |
| No | 91 | 76.5 | 28 | 23.5 | 0.00 | 1.00 |
| Yes | 16 | 76.2 | 5 | 23.8 |
| Pregnancy-associated illness |  |  |  |  |  |  |
| No | 34 | 87.2 | 5 | 12.8 | 2.69 | 0.10 |
| Yes | 73 | 72.3 | 28 | 27.7 |
| Breastfeeding difficulty |  |  |  |  |  |  |
| No | 87 | 79.1 | 23 | 20.9 | 1.39 | 0.24 |
| Yes | 20 | 66.7 | 10 | 33.3 |
| Perinatal complication | |  |  |  |  |  |
| No | 12 | 92.3 | 1 | 7.7 | 1.15 | 0.28 |
| Yes | 95 | 74.8 | 32 | 25.2 |  |
| Desired pregnancy | |  |  |  |  |  |
| No | 87 | 79.8 | 22 | 20.2 | 2.34 | 0.13 |
| Yes | 20 | 64.5 | 11 | 35.5 |
| NB exclusive attention |  |  |  |  |  |  |
| No | 42 | 84 | 8 | 16 | 1.86 | 0.17 |
| Yes | 65 | 72.2 | 25 | 27.8 |
| Fulfils maternal role |  |  |  |  |  |  |
| No | 105 | 77.2 | 31 | 22.8 | 0.44 | 0.51 |
| Yes | 2 | 50 | 2 | 50 |
